# Supplementary material for: Synthesis of the stable UO2I2, the last of the uranyl dihalides. X-Ray crystal structure of [UO2I2(py)3]Electronic supplementary information (ESI) available: full experimental details. See http://www.rsc.org/suppdata/cc/b4/b400717d/
Source: Royal Society of Chemistry journal article supplement (doi:10.1039/b400717d), 2004-01-01
Supplement: b400717d.doc [file b400717d.doc]

Supplementary Material for

Synthesis of the stable UO2I2, the last of the uranyl dihalides. X-ray crystal structure of [UO2I2(py)3]

Jean-Claude Berthet,* Martine Nierlich and Michel Ephritikhine

.

a Service de Chimie Moléculaire, DSM, DRECAM, CNRS URA 331, CEA Saclay,
91191 Gif- sur-Yvette, France Fax: +33(0)169086640; Tel: +33(0)169086436; E-mail: berthet@drecam.cea.fr

**Experimental**

The complexes described below are moisture sensitive.

Syntheses and manipulations of the compounds were conducted under ultra high purity argon atmosphere with rigorous exclusion of air and water, using Shlenk-vessel and vacuum-line techniques or in a glove box.

Uranyl triflate, UO2(OTf)2, was prepared as previously described (Ref. 8 in the communication)

Diethyl ether and tetrahydrofuran were dried over a mixture of sodium-benzophenone and pyridine over potassium.

Iodotrimethylsilane, purchased from Aldrich, was used as received and kept under argon at 4°C. Potassium iodide (Prolabo rectapur, 99% min.) was finely crushed and dried under vacuum for 24 h at 150°C before use.

IR samples were prepared as Nujol mulls between KBr round cell windows purchased from Aldrich.

Elemental analyses were performed by Analytische Laboratories (Lindlar, Germany).

**Preparation of UO2I2 (1) :**

Yellow UO2(OTf)2 (255 mg, 0.45 mmol) was suspended at 20°C in pure iodotrimethylsilane (5 mL). The color of the solution rapidly turned red and a brown material precipitated. After 48 h at 20°C, pentane (20 mL ) was added into the reaction mixture and the beige powder of **1** was filtered off, washed with pentane (2 x 25 mL) and dried under vacuum (232 mg, 99%).

Anal. Calcd for I2O2U: U, 45.44; I, 48.45. Found: U, 45.65; I, 48.16.

IR (in Nujol between NaCl cell windows) : 1651w, 1350s, 1287m, 1265s, 1209s, 1130s, 1055s, 1028s, 988 and 982 s, 898w, 833w, 645s, 510 m.

**Preparations of [UO2I2(py)3] (2) :**

1) Addition of diethyl ether (10 mL) and pentane (10 mL) to a clear red solution of **1** (200 mg, 0.38 mmol) in pyridine (5 mL) induces the precipitation of a red powder of **2** ( 276 mg, 95 %).

Anal. Calcd for C15H15I2N3O2U: C, 23.67; H, 1.98; N, 5.52; I, 33.34. Found: C, 24.00; H, 1.99; N, 5.68; I, 33.52.

IR (in Nujol between NaCl cell windows) : 1600m, 1446s, 1331w, 1240w, 1201w, 1180w, 1151w, s, 1065m, 1040m, 1017w, 1009m, 927s, 754m,722w, 694m, 630m.

2) UO2(OTf)2 (200 mg, 0.35 mmol) and KI (500 mg, 3.0 mmol) were reacted for 24 h at 20°C in Et2O (30 mL). After filtration of the orange solution, pyridine (3 mL) was condensed into it and a red precipitate was formed. Addition of further 10 mL of pentane, filtration and washing with Et2O (5mL) afforded, after drying under vacuum, a red powder of **2** in 91 % yield (305 mg).

Anal. Calcd for C15H15I2N3O2U: C, 23.67; H, 1.98; N, 5.52. Found: C, 23.53; H, 1.95; N, 5.53.

**Preparation of [UO2I2(THF)3] (3) :**

UO2(OTf)2 (200 mg, 0.35 mmol) and KI (550 mg, 3.3 mmol) were suspended in 30 mL of thf for 24 h at 20°C. After filtration of the red solution, the solvent was evaporated off and the residue dried under vacuum. Extraction in toluene (25 mL) and evaporation gave a red powder which was recristallized from thf-pentane (5 mL\20 mL); the crystals of **3** were filtered off and dried under vacuum (208 mg, 80 %).

Anal. Calcd for C12H24I2O5U: C, 19.47; H, 3.27; I, 34.29. Found: C, 19.20; H, 3.19; I, 34.09.

IR (in Nujol between NaCl cell windows) : 1650w, 1451s, 1344m, 1261w, 1245w, 1206w, 1169w, 1036w, 995m, 956w, 928s, 827s, 722m, 678w.

The melting points of **2** and **3** were measured with an electrothermal, melting point apparatus from samples placed in glass capillaries under argon. The thermal decomposition range of **1** was estimated by observing the liberation of iodine.

**Decomposition reactions in the presence of water** :

An NMR tube was charged with UO2I2 (10 mg, 0.019 mmol) and 0.6 mL of diethyl ether. Addition of deoxygenated water (3 L, 0.16 mmol) via a 5L microsyringe induced immediate change from an orange suspension to a yellow solution. After stirring for 10 mn in an ultrasonic bath, evaporation of the solvent led to a brown residue from which liberation of iodine was noticed. After drying under vacuum, addition of Et2O (*ca* 1 mL) led to a pale yellow solution and a black insoluble material.

An NMR tube charged with UO2(OTf)2 (10 mg, 0.017 mmol), 0.5 mL of diethyl ether and 5 L of deoxygenated water (0.27 mmol) was stirred in an ultrasonic bath for 5 h, then kept at room temperature for 48 h. The yellow-orange solution was evaporated under vacuum affording first an orange residue which rapidly turned brown-black with release of iodine.

**View of [UO2I2(py)3] (3) with displacement ellipsoids at the 30% probability level**

**
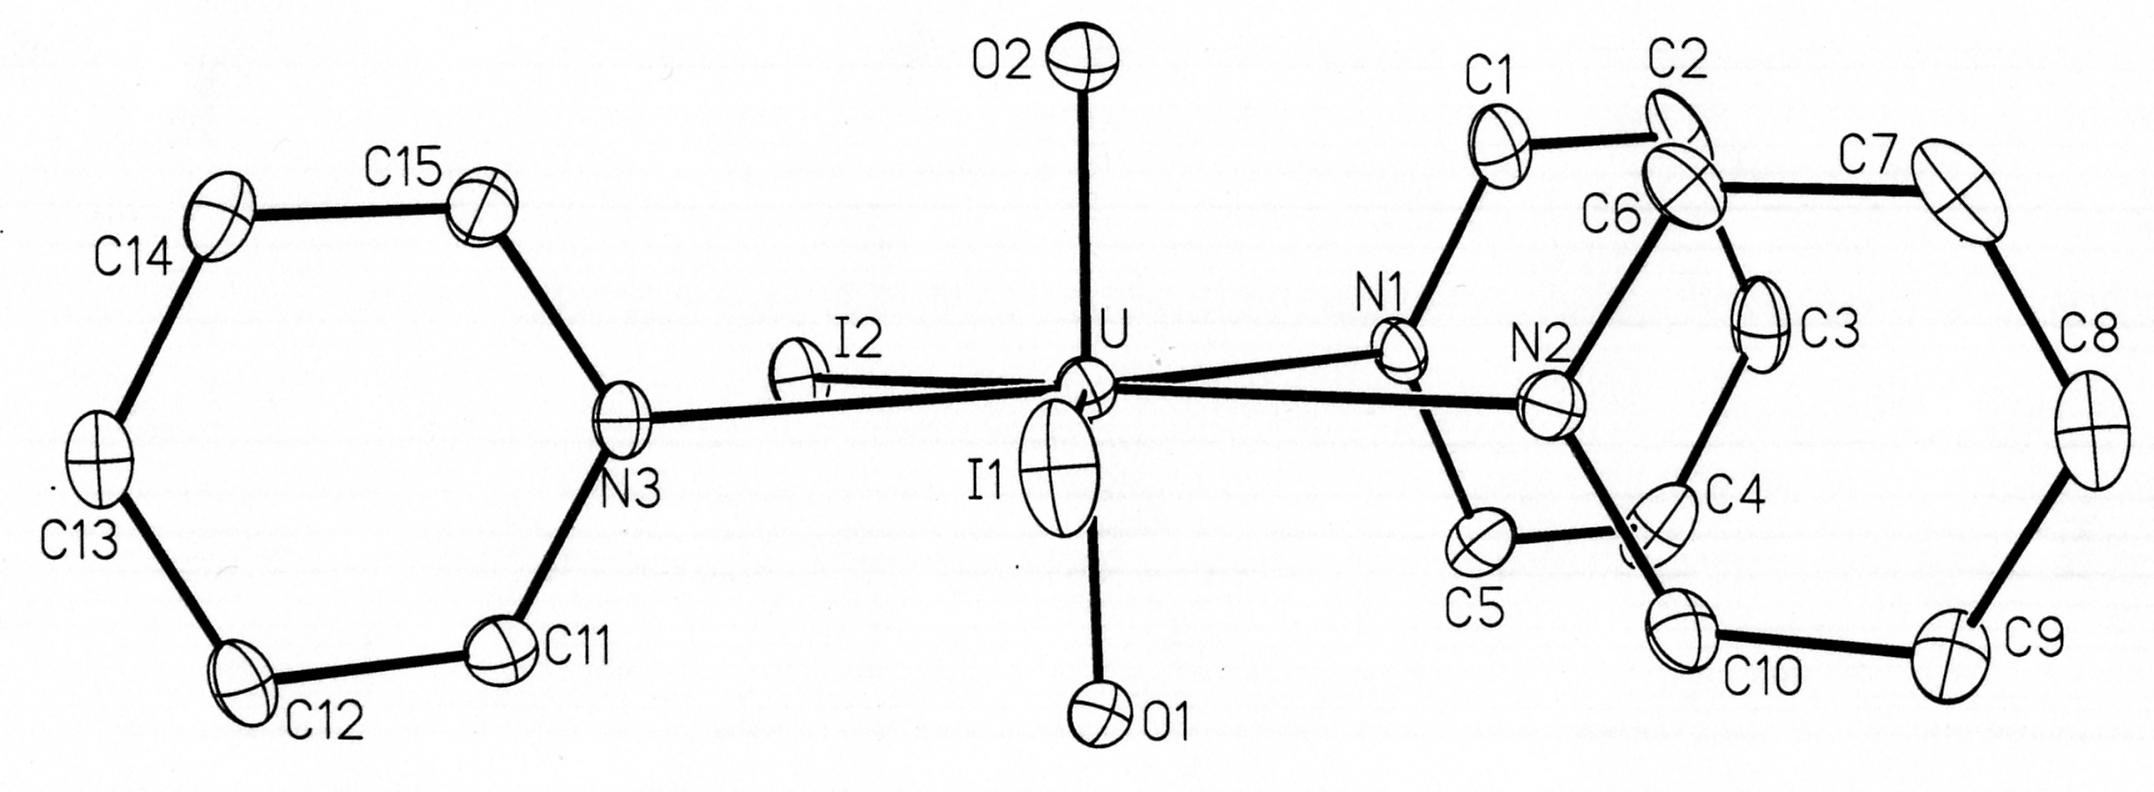
**

Crystallographic data for the structure reported here have been deposited with the Cambridge Crystallographic Data Center as supplementary publication n° 226281. Copies of the data can be obtained free of charge on application to CCDC, 12 Union Rd., Cambridge, CB21EZ, UK (fax: (+44) 1223-336-033; email: deposit@ccdc.cam.ac.uk).
